# Supplementary material for: Comprehensive genome- and transcriptome-wide analyses of mutations associated with microsatellite instability in Korean gastric cancers
Source: HighWire-hosted journal article supplement (doi:10.1101/gr.145706.112), 2013-06-04
Supplement: Supplemental_Table_S5.xlsx [file Supplemental_Table_S5.xlsx]

## Sheet: Driver Gene Score
Table S5
• Note
1All MS in Intron; Number of all existed microsatellites located in intron region of a gene
2All MS in CDS; Number of all existed microsatellites located in CDS region of a gene
3Mutated MS in Intron; Number of mutated microsatellites located in intron region of a gene
4Mutated MS in CDS; Number of mutated microsatellites located in CDS region of a gene
5Driver gene score; Q score
Ensembl Accession		Gene symbol	Name	Occurrence		All MS in Intron1	All MS in CDS2	Mutated MS in Intron3	Mutated MS in CDS4	P-value	Q-value	Driver gene score5
Gene ID	Transcript ID			MSI	MSS
ENSG00000172927	ENST00000308946	MYEOV	myeloma overexpressed	2	0	3	3	0	2	6.57e-06	0.000567	3.25
ENSG00000163513	ENST00000295754	TGFBR2	transforming growth factor, beta receptor II	4	1	539	2	31	3	1.51e-05	0.000651	3.19
ENSG00000156298	ENST00000378482	TSPAN7	tetraspanin 7	1	0	115	1	0	1	1.9e-05	0.000702	3.15
ENSG00000177963	ENST00000325207	RIC8A	resistance to inhibitors of cholinesterase 8 homolog A	2	1	11	5	0	2	2.99e-05	0.00086	3.07
ENSG00000188316	ENST00000341276	ENO4	enolase family member 4	6	2	195	6	2	3	3.61e-05	0.000934	3.03
ENSG00000109084	ENST00000226230	TMEM97	transmembrane protein 97	7	0	56	4	2	3	4.21e-05	0.00099	3
ENSG00000169330	ENST00000305428	KIAA1024	KIAA1024	5	0	184	8	0	3	4.71e-05	0.00102	2.99
ENSG00000026652	ENST00000320285	AGPAT4	1-acylglycerol-3-phosphate O-acyltransferase 4	1	0	193	1	2	1	6.21e-05	0.00113	2.95
ENSG00000197183	ENST00000359676	C20orf112	chromosome 20 open reading frame 112	2	0	146	6	0	2	6.38e-05	0.00113	2.95
ENSG00000092051	ENST00000397118	JPH4	junctophilin 4	2	0	31	6	0	2	6.53e-05	0.00113	2.95
ENSG00000188783	ENST00000419896	PRELP	proline/arginine-rich end leucine-rich repeat protein	4	0	15	1	0	1	7.86e-05	0.0012	2.92
ENSG00000166866	ENST00000300119	MYO1A	myosin IA	3	0	114	10	0	3	0.000104	0.00137	2.86
ENSG00000117090	ENST00000302035	SLAMF1	signaling lymphocytic activation molecule family member 1	3	0	230	5	10	3	0.000106	0.00137	2.86
ENSG00000149742	ENST00000279178	SLC22A9	solute carrier family 22	3	0	290	4	15	3	0.000217	0.00246	2.61
ENSG00000105261	ENST00000262637	OVOL3	ovo-like 3	1	0	4	2	0	1	0.000251	0.00246	2.61
ENSG00000166578	ENST00000392574	IQCD	IQ motif containing D	5	0	126	8	8	5	0.000258	0.00246	2.61
ENSG00000170315	ENST00000302182	UBB	ubiquitin B	1	0	3	2	0	1	0.000261	0.00246	2.61
ENSG00000189120	ENST00000342234	SP6	Sp6 transcription factor	1	0	21	2	0	1	0.000261	0.00246	2.61
ENSG00000170178	ENST00000406506	HOXD12	homeobox D12	1	0	1	2	0	1	0.000264	0.00246	2.61
ENSG00000213892	ENST00000396750	CEACAM16	carcinoembryonic antigen-related cell adhesion molecule 16	3	0	48	3	9	3	0.000266	0.00246	2.61
ENSG00000083454	ENST00000225328	P2RX5	purinergic receptor P2X, ligand-gated ion channel, 5	3	1	97	3	0	3	0.000309	0.00272	2.57
ENSG00000169062	ENST00000375299	UPF3A	UPF3 regulator of nonsense transcripts homolog A	3	0	153	11	3	3	0.000315	0.00272	2.57
ENSG00000214248	ENST00000397924	AC010336.2	Uncharacterized protein	3	0	43	4	3	3	0.000341	0.0028	2.55
ENSG00000069943	ENST00000164305	PIGB	phosphatidylinositol glycan anchor biosynthesis, class B	3	0	272	9	8	3	0.000346	0.0028	2.55
ENSG00000160654	ENST00000292144	CD3G	CD3g molecule, gamma	3	0	39	2	1	2	0.00043	0.00337	2.47
ENSG00000164897	ENST00000392818	TMUB1	transmembrane and ubiquitin-like domain containing 1	1	0	2	3	0	1	0.000524	0.00399	2.4
ENSG00000234776	ENST00000449465	C11orf94	chromosome 11 open reading frame 94	1	0	3	3	0	1	0.000576	0.00412	2.39
ENSG00000173868	ENST00000413580	PHOSPHO1	phosphatase, orphan 1	1	0	10	3	0	1	0.000583	0.00412	2.39
ENSG00000215504	ENST00000400470	AP000974.1	CDNA FLJ26432 fis, clone KDN01418; Uncharacterized protein	7	2	101	1	16	2	0.000589	0.00412	2.39
ENSG00000135211	ENST00000257663	TMEM60	transmembrane protein 60	2	0	27	2	0	2	0.000609	0.00414	2.38
ENSG00000148737	ENST00000369397	TCF7L2	transcription factor 7-like 2	7	0	1550	8	51	2	0.000624	0.00414	2.38
ENSG00000182010	ENST00000373789	RTKN2	rhotekin 2	6	0	605	10	17	3	0.000682	0.00439	2.36
ENSG00000180198	ENST00000398962	RCC1	regulator of chromosome condensation 1	1	0	38	3	0	1	0.000696	0.00439	2.36
ENSG00000186188	ENST00000371483	O3FAR1	omega-3 fatty acid receptor 1	11	0	58	1	1	1	0.000727	0.00448	2.35
ENSG00000118369	ENST00000263311	USP35	ubiquitin specific peptidase 35	5	0	110	10	1	2	0.000771	0.00464	2.33
ENSG00000171130	ENST00000307445	ATP6V0E2	ATPase, H+ transporting V0 subunit e2	1	0	10	4	0	1	0.000924	0.00525	2.28
ENSG00000165280	ENST00000358901	VCP	valosin containing protein	4	0	59	4	0	2	0.000934	0.00525	2.28
ENSG00000037757	ENST00000040663	MRI1	methylthioribose-1-phosphate isomerase homolog	4	0	13	4	0	1	0.00099	0.00534	2.27
ENSG00000163485	ENST00000367236	ADORA1	adenosine A1 receptor	1	0	82	4	0	1	0.00123	0.0065	2.19
ENSG00000131386	ENST00000339732	GALNTL2	UDP-N-acetyl-alpha-D-galactosamine:polypeptide N-acetylgalactosaminyltransferase-like 2	7	4	65	6	0	1	0.00139	0.00715	2.15
ENSG00000187045	ENST00000381792	TMPRSS6	transmembrane protease, serine 6	1	0	148	4	2	1	0.00141	0.00715	2.15
ENSG00000166676	ENST00000299866	TVP23A	family with sequence similarity 18, member A	7	0	279	3	5	3	0.00149	0.00726	2.14
ENSG00000184697	ENST00000396925	CLDN6	claudin 6	1	0	7	5	0	1	0.00152	0.00726	2.14
ENSG00000141753	ENST00000269593	IGFBP4	insulin-like growth factor binding protein 4	1	0	28	5	0	1	0.00159	0.00726	2.14
ENSG00000151366	ENST00000281031	NDUFC2	NADH dehydrogenase	7	2	49	4	3	2	0.0016	0.00726	2.14
ENSG00000136856	ENST00000373371	SLC2A8	solute carrier family 2	3	1	27	6	0	1	0.00164	0.00732	2.14
ENSG00000152034	ENST00000281806	MCHR2	melanin-concentrating hormone receptor 2	2	0	605	4	8	2	0.0017	0.00746	2.13
ENSG00000135454	ENST00000341156	B4GALNT1	beta-1,4-N-acetyl-galactosaminyl transferase 1	1	0	18	6	0	1	0.00195	0.00827	2.08
ENSG00000227059	ENST00000419717	ANHX	anomalous homeobox	1	0	42	6	0	1	0.00195	0.00827	2.08
ENSG00000124203	ENST00000371030	ZNF831	zinc finger protein 831	5	0	399	23	1	3	0.00207	0.00854	2.07
ENSG00000213654	ENST00000375040	GPSM3	G-protein signaling modulator 3	1	0	4	6	0	1	0.00215	0.00854	2.07
ENSG00000167371	ENST00000300797	PRRT2	proline-rich transmembrane protein 2	4	0	1	7	0	1	0.00217	0.00854	2.07
ENSG00000125731	ENST00000245908	SH2D3A	SH2 domain containing 3A	1	0	26	6	0	1	0.00219	0.00854	2.07
ENSG00000137822	ENST00000399460	TUBGCP4	tubulin, gamma complex associated protein 4	2	0	217	8	1	2	0.00221	0.00854	2.07
ENSG00000110448	ENST00000347785	CD5	CD5 molecule	1	0	55	6	0	1	0.00225	0.00855	2.07
ENSG00000159314	ENST00000376922	ARHGAP27	Rho GTPase activating protein 27	1	0	77	6	0	1	0.00228	0.00855	2.07
ENSG00000215066	ENST00000399539	C9orf38	chromosome 9 open reading frame 38	6	1	44	3	8	3	0.00239	0.00884	2.05
ENSG00000196243	ENST00000359455	LINC00615	long intergenic non-protein coding RNA 615	2	0	66	2	6	2	0.00289	0.0101	2
ENSG00000125788	ENST00000382398	DEFB126	defensin, beta 126	2	1	15	3	0	2	0.0029	0.0101	2
ENSG00000204227	ENST00000374656	RING1	ring finger protein 1	1	0	4	7	0	1	0.00291	0.0101	2
ENSG00000140285	ENST00000267843	FGF7	fibroblast growth factor 7	4	1	504	2	9	1	0.00291	0.0101	2
ENSG00000121281	ENST00000394697	ADCY7	adenylate cyclase 7	1	0	168	7	1	1	0.00293	0.0101	2
ENSG00000132031	ENST00000407540	MATN3	matrilin 3	1	0	106	1	0	1	0.00299	0.0102	1.99
ENSG00000168003	ENST00000377892	SLC3A2	solute carrier family 3	1	0	214	2	0	1	0.00322	0.0108	1.97
ENSG00000163568	ENST00000368130	AIM2	absent in melanoma 2	3	0	109	7	2	3	0.00346	0.0113	1.95
ENSG00000168096	ENST00000446014	ANKS3	ankyrin repeat and sterile alpha motif domain containing 3	1	0	54	8	0	1	0.0038	0.0121	1.92
ENSG00000157703	ENST00000441685	SVOPL	SVOP-like	2	0	424	2	8	1	0.0039	0.0123	1.91
ENSG00000186185	ENST00000438933	KIF18B	kinesin family member 18B	2	0	40	15	0	2	0.004	0.0125	1.9
ENSG00000121989	ENST00000241416	ACVR2A	activin A receptor, type IIA	7	2	673	9	11	3	0.00436	0.0133	1.88
ENSG00000184371	ENST00000329608	CSF1	colony stimulating factor 1	1	0	49	8	0	1	0.00475	0.0143	1.84
ENSG00000144199	ENST00000414820	FAHD2B	fumarylacetoacetate hydrolase domain containing 2B	1	0	39	3	0	1	0.00491	0.0146	1.84
ENSG00000015532	ENST00000017003	XYLT2	xylosyltransferase II	5	0	49	9	0	1	0.00501	0.0146	1.84
ENSG00000167302	ENST00000374769	C17orf56	chromosome 17 open reading frame 56	1	0	39	9	0	1	0.00501	0.0146	1.84
ENSG00000184828	ENST00000332053	ZBTB7C	zinc finger and BTB domain containing 7C	1	0	26	9	0	1	0.00517	0.0149	1.83
ENSG00000213413	ENST00000317271	PVRIG	poliovirus receptor related immunoglobulin domain containing	1	0	3	10	0	1	0.00553	0.0157	1.8
ENSG00000127870	ENST00000381588	RNF6	ring finger protein	1	0	43	5	0	1	0.0057	0.0158	1.8
ENSG00000109762	ENST00000504273	SNX25	sorting nexin 25	3	0	899	9	12	3	0.00582	0.0158	1.8
ENSG00000177465	ENST00000326303	ACOT4	acyl-CoA thioesterase 4	1	0	10	3	0	1	0.00583	0.0158	1.8
ENSG00000084764	ENST00000233121	MAPRE3	microtubule-associated protein, RP/EB family, member 3	1	0	252	4	1	1	0.00604	0.0158	1.8
ENSG00000187957	ENST00000341772	DNER	delta/notch-like EGF repeat containing	1	0	1758	4	9	1	0.00604	0.0158	1.8
ENSG00000188389	ENST00000334409	PDCD1	programmed cell death 1	1	0	35	4	1	1	0.00605	0.0158	1.8
ENSG00000167077	ENST00000401548	MEI1	meiosis inhibitor 1	1	0	576	8	1	1	0.00611	0.0158	1.8
ENSG00000133106	ENST00000313624	EPSTI1	epithelial stromal interaction 1	2	0	594	3	9	1	0.00612	0.0158	1.8
ENSG00000204365	ENST00000375520	C10orf126	chromosome 10 open reading frame 126	4	0	176	3	1	1	0.00622	0.0159	1.8
ENSG00000074695	ENST00000251047	LMAN1	lectin, mannose-binding, 1	5	0	193	7	8	3	0.0067	0.0167	1.78
ENSG00000117713	ENST00000324856	ARID1A	AT rich interactive domain 1A	8	0	436	31	0	3	0.0068	0.0167	1.78
ENSG00000162736	ENST00000368066	NCSTN	nicastrin	1	0	56	3	0	1	0.00707	0.0167	1.78
ENSG00000198369	ENST00000356388	SPRED2	sprouty-related, EVH1 domain containing 2	1	0	575	5	1	1	0.00727	0.0167	1.78
ENSG00000204618	ENST00000244360	RNF39	ring finger protein 39	2	2	18	3	0	1	0.00731	0.0167	1.78
ENSG00000136160	ENST00000377211	EDNRB	endothelin receptor type B	1	0	118	4	0	1	0.00734	0.0167	1.78
ENSG00000102524	ENST00000430559	TNFSF13B	tumor necrosis factor	1	0	303	4	1	1	0.00734	0.0167	1.78
ENSG00000185359	ENST00000329138	HGS	hepatocyte growth factor-regulated tyrosine kinase substrate	1	0	49	11	0	1	0.00737	0.0167	1.78
ENSG00000184675	ENST00000330258	FAM123B	family with sequence similarity 123B	2	0	49	12	0	2	0.00741	0.0167	1.78
ENSG00000152779	ENST00000341233	SLC16A12	solute carrier family 16, member 12	5	6	709	4	13	1	0.00747	0.0167	1.78
ENSG00000182674	ENST00000329185	KCNB2	potassium voltage-gated channel, Shab-related subfamily, member 2	2	0	2432	12	51	2	0.00747	0.0167	1.78
ENSG00000164050	ENST00000358536	PLXNB1	plexin B1	2	0	81	25	1	2	0.00758	0.0168	1.77
ENSG00000213585	ENST00000265333	VDAC1	voltage-dependent anion channel 1	1	0	170	1	1	1	0.00779	0.0171	1.77
ENSG00000203443	ENST00000366261	AC092964.1	Uncharacterized protein	4	0	26	3	0	2	0.00788	0.0171	1.77
ENSG00000166402	ENST00000305253	TUB	tubby homolog	7	3	134	6	3	1	0.00825	0.0178	1.75
ENSG00000140157	ENST00000337451	NIPA2	non imprinted in Prader-Willi/Angelman syndrome 2	4	0	200	3	9	1	0.00833	0.0178	1.75
ENSG00000110274	ENST00000278935	CEP164	centrosomal protein 164kDa	4	0	506	15	22	2	0.00847	0.018	1.74
ENSG00000151131	ENST00000280749	C12orf45	chromosome 12 open reading frame 45	1	0	46	1	3	1	0.00876	0.0184	1.74
ENSG00000156113	ENST00000441477	KCNMA1	potassium large conductance calcium-activated channel, subfamily M, alpha member 1	10	0	3001	15	69	2	0.0089	0.0186	1.73
ENSG00000166813	ENST00000300053	KIF7	kinesin family member 7	1	0	96	13	0	1	0.00897	0.0186	1.73
ENSG00000183087	ENST00000357389	GAS6	growth arrest-specific 6	1	0	166	8	2	1	0.00954	0.0196	1.71
ENSG00000111049	ENST00000228644	MYF5	myogenic factor 5	1	0	5	3	0	1	0.0101	0.0203	1.69
ENSG00000160803	ENST00000368309	UBQLN4	ubiquilin 4	1	0	31	12	0	1	0.0103	0.0203	1.69
ENSG00000133119	ENST00000380071	RFC3	replication factor C	1	0	121	4	2	1	0.0106	0.0208	1.68
ENSG00000138311	ENST00000395254	ZNF365	zinc finger protein 365	3	3	141	4	0	1	0.0108	0.0209	1.68
ENSG00000068489	ENST00000262293	PRR11	proline rich 11	2	0	283	3	4	2	0.011	0.0209	1.68
ENSG00000128602	ENST00000249373	SMO	smoothened, frizzled family receptor	1	0	118	8	0	1	0.011	0.0209	1.68
ENSG00000117899	ENST00000261758	MESDC2	mesoderm development candidate 2	2	0	54	4	1	1	0.0111	0.021	1.68
ENSG00000196235	ENST00000359191	SUPT5H	suppressor of Ty 5 homolog	1	0	64	14	0	1	0.0113	0.0212	1.67
ENSG00000013588	ENST00000014914	GPRC5A	G protein-coupled receptor, family C, group 5, member A	3	0	96	3	0	1	0.0115	0.0214	1.67
ENSG00000164621	ENST00000297163	SMAD5-AS1	SMAD5 antisense RNA 1	1	0	19	3	0	1	0.0121	0.0221	1.66
ENSG00000162341	ENST00000294309	TPCN2	two pore segment channel 2	2	2	146	4	1	1	0.0122	0.0221	1.66
ENSG00000104413	ENST00000433389	ESRP1	epithelial splicing regulatory protein 1	4	0	481	8	9	1	0.0122	0.0221	1.66
ENSG00000112742	ENST00000509894	TTK	TTK protein kinase	4	0	299	14	3	4	0.0127	0.0228	1.64
ENSG00000169306	ENST00000378993	IL1RAPL1	interleukin 1 receptor accessory protein-like 1	5	2	6148	2	4	1	0.013	0.0229	1.64
ENSG00000133393	ENST00000255759	FOPNL	FGFR1OP N-terminal like	1	0	156	2	3	1	0.013	0.0229	1.64
ENSG00000248751	ENST00000434291	RP1-130H16.18	Uncharacterized protein	1	0	35	3	2	1	0.0131	0.0229	1.64
ENSG00000182263	ENST00000333129	FIGN	fidgetin	15	4	939	13	9	2	0.0136	0.0236	1.63
ENSG00000100393	ENST00000263253	EP300	E1A binding protein p300	3	1	665	31	9	2	0.0138	0.0238	1.62
ENSG00000162992	ENST00000295108	NEUROD1	neuronal differentiation 1	1	0	11	4	0	1	0.0147	0.0252	1.6
ENSG00000108064	ENST00000487519	TFAM	transcription factor A, mitochondrial	7	0	71	8	5	2	0.0149	0.0254	1.6
ENSG00000141542	ENST00000269347	RAB40B	RAB40B, member RAS oncogene family	1	0	216	4	0	1	0.0151	0.0254	1.6
ENSG00000050767	ENST00000390654	COL23A1	collagen, type XXIII, alpha 1	1	0	712	11	7	1	0.0152	0.0254	1.6
ENSG00000156097	ENST00000286603	GPR61	G protein-coupled receptor 61	1	0	15	8	0	1	0.0154	0.0255	1.59
ENSG00000165194	ENST00000373034	PCDH19	protocadherin 19	4	0	710	5	7	1	0.0157	0.0259	1.59
ENSG00000174938	ENST00000308713	SEZ6L2	seizure related 6 homolog	2	0	43	17	0	1	0.0161	0.0262	1.58
ENSG00000166860	ENST00000300101	ZBTB39	zinc finger and BTB domain containing 39	3	0	7	6	0	1	0.0162	0.0262	1.58
ENSG00000158113	ENST00000425921	LRRC43	leucine rich repeat containing 43	1	0	104	6	1	1	0.0162	0.0262	1.58
ENSG00000169592	ENST00000304516	INO80E	INO80 complex subunit E	2	0	53	4	1	1	0.0164	0.0262	1.58
ENSG00000198498	ENST00000358572	TMA16	translation machinery associated 16 homolog	2	0	191	7	1	2	0.0167	0.0265	1.58
ENSG00000108405	ENST00000225538	P2RX1	purinergic receptor P2X, ligand-gated ion channel, 1	1	0	98	5	0	1	0.017	0.0267	1.57
ENSG00000116785	ENST00000367425	CFHR3	complement factor H-related 3	1	0	65	2	0	1	0.0171	0.0267	1.57
ENSG00000173409	ENST00000310256	ARV1	ARV1 homolog	1	0	116	2	0	1	0.0171	0.0267	1.57
ENSG00000143390	ENST00000290524	RFX5	regulatory factor X, 5	2	0	13	9	0	1	0.0174	0.027	1.57
ENSG00000102891	ENST00000219162	MT4	metallothionein 4	1	0	5	1	1	1	0.0175	0.027	1.57
ENSG00000108061	ENST00000369452	SHOC2	soc-2 suppressor of clear homolog	8	0	763	6	4	1	0.0183	0.028	1.55
ENSG00000178921	ENST00000314666	PFAS	phosphoribosylformylglycinamidine synthase	4	0	30	18	0	1	0.0187	0.0285	1.55
ENSG00000173786	ENST00000310262	CNP	2',3'-cyclic nucleotide 3' phosphodiesterase	1	0	26	6	0	1	0.0189	0.0286	1.54
ENSG00000055070	ENST00000401088	C1orf144	chromosome 1 open reading frame 144	3	0	175	3	0	1	0.0192	0.0287	1.54
ENSG00000215853	ENST00000316073	RPTN	repetin	1	0	10	3	0	1	0.0192	0.0287	1.54
ENSG00000100767	ENST00000427855	PAPLN	papilin, proteoglycan-like sulfated glycoprotein	2	0	97	17	1	1	0.0194	0.0287	1.54
ENSG00000126822	ENST00000247226	PLEKHG3	pleckstrin homology domain containing, family G	4	0	175	9	0	1	0.0194	0.0287	1.54
ENSG00000163348	ENST00000368457	PYGO2	pygopus homolog 2	1	0	4	17	0	1	0.0199	0.0293	1.53
ENSG00000152463	ENST00000378217	OLAH	oleoyl-ACP hydrolase	4	0	232	7	4	1	0.0203	0.0297	1.53
ENSG00000110076	ENST00000265459	NRXN2	neurexin 2	2	0	372	19	3	1	0.0205	0.0298	1.53
ENSG00000152214	ENST00000326695	RIT2	Ras-like without CAAX 2	1	0	2662	3	16	1	0.0211	0.0303	1.52
ENSG00000132970	ENST00000381468	WASF3	WAS protein family, member 3	6	0	859	10	3	1	0.0212	0.0303	1.52
ENSG00000100528	ENST00000216416	CNIH	cornichon homolog	3	2	105	2	1	1	0.0217	0.0304	1.52
ENSG00000142627	ENST00000358432	EPHA2	EPH receptor A2	1	0	171	11	1	1	0.0218	0.0304	1.52
ENSG00000153006	ENST00000396710	SREK1IP1	SREK1-interacting protein 1	10	0	336	12	24	4	0.0218	0.0304	1.52
ENSG00000143126	ENST00000271332	CELSR2	cadherin, EGF LAG seven-pass G-type receptor 2	2	0	63	37	1	2	0.0219	0.0304	1.52
ENSG00000134028	ENST00000256412	ADAMDEC1	ADAM-like, decysin 1	3	0	125	4	1	1	0.0221	0.0304	1.52
ENSG00000164687	ENST00000396359	FABP5	fatty acid binding protein 5	3	0	10	4	0	1	0.0221	0.0304	1.52
ENSG00000172671	ENST00000374366	ZFAND4	zinc finger, AN1-type domain 4	3	0	450	6	8	1	0.023	0.0313	1.5
ENSG00000138134	ENST00000371927	STAMBPL1	STAM binding protein-like 1	5	0	504	6	2	1	0.023	0.0313	1.5
ENSG00000155495	ENST00000285879	MAGEC1	melanoma antigen family C, 1	1	0	12	12	0	1	0.0231	0.0313	1.5
ENSG00000134852	ENST00000309964	CLOCK	clock homolog	3	0	564	7	25	2	0.0236	0.0313	1.5
ENSG00000011007	ENST00000418390	TCEB3	transcription elongation factor B	5	0	91	7	1	2	0.0236	0.0313	1.5
ENSG00000164749	ENST00000396423	HNF4G	hepatocyte nuclear factor 4, gamma	2	2	174	5	0	1	0.0236	0.0313	1.5
ENSG00000170236	ENST00000456636	USP50	ubiquitin specific peptidase 50	1	0	306	6	4	1	0.0237	0.0313	1.5
ENSG00000198756	ENST00000361927	GLT25D2	glycosyltransferase 25 domain containing 2	8	2	519	5	0	1	0.0237	0.0313	1.5
ENSG00000143061	ENST00000369486	IGSF3	immunoglobulin superfamily, member 3	1	0	353	12	2	1	0.0241	0.0316	1.5
ENSG00000182077	ENST00000438700	PTCHD3	patched domain containing 3	4	0	107	20	1	2	0.0242	0.0316	1.5
ENSG00000086300	ENST00000338523	SNX10	sorting nexin 10	4	0	508	3	4	1	0.0247	0.032	1.49
ENSG00000185946	ENST00000423855	RNPC3	RNA-binding region	3	0	219	11	8	3	0.0247	0.032	1.49
ENSG00000196924	ENST00000422373	FLNA	filamin A, alpha	1	0	69	24	0	1	0.0252	0.0322	1.49
ENSG00000104044	ENST00000354638	OCA2	oculocutaneous albinism II	1	0	2197	7	15	1	0.0252	0.0322	1.49
ENSG00000169154	ENST00000307599	GOT1L1	glutamic-oxaloacetic transaminase 1-like 1	1	0	40	6	1	1	0.0253	0.0322	1.49
ENSG00000155970	ENST00000318063	EFHA2	EF-hand domain family, member A2	2	0	703	11	6	2	0.0254	0.0322	1.49
ENSG00000115665	ENST00000264047	SLC5A7	solute carrier family 5	2	0	106	4	0	1	0.0264	0.0332	1.48
ENSG00000132437	ENST00000444124	DDC	dopa decarboxylase	3	1	586	4	4	1	0.0268	0.0335	1.47
ENSG00000234127	ENST00000454678	TRIM26	tripartite motif containing 26	1	0	158	6	1	1	0.0269	0.0335	1.47
ENSG00000137757	ENST00000447697	CASP5	caspase 5, apoptosis-related cysteine peptidase	5	0	195	9	6	2	0.0272	0.0337	1.47
ENSG00000107854	ENST00000371627	TNKS2	tankyrase, TRF1-interacting ankyrin-related ADP-ribose polymerase 2	5	2	513	8	14	1	0.0275	0.0337	1.47
ENSG00000204138	ENST00000373839	PHACTR4	phosphatase and actin regulator 4	12	1	1052	10	44	2	0.0275	0.0337	1.47
ENSG00000178814	ENST00000360660	OPLAH	5-oxoprolinase	1	0	25	24	0	1	0.0276	0.0337	1.47
ENSG00000004534	ENST00000454079	RBM6	RNA binding motif protein 6	6	0	1062	5	283	3	0.028	0.034	1.47
ENSG00000160229	ENST00000425625	ZNF66P	zinc finger protein 66, pseudogene	4	1	161	7	6	4	0.0282	0.034	1.47
ENSG00000136827	ENST00000437532	TOR1A	torsin family 1, member A	2	0	30	4	0	1	0.0284	0.034	1.47
ENSG00000077514	ENST00000263681	POLD3	polymerase	4	0	337	10	12	2	0.0284	0.034	1.47
ENSG00000143368	ENST00000271628	SF3B4	splicing factor 3b, subunit 4, 49kDa	1	0	14	14	0	1	0.029	0.0344	1.46
ENSG00000172660	ENST00000311979	TAF15	TAF15 RNA polymerase II, TATA box binding protein	1	0	217	11	2	1	0.0296	0.035	1.46
ENSG00000187676	ENST00000343307	B3GALTL	beta 1,3-galactosyltransferase-like	3	0	747	7	15	1	0.0301	0.0352	1.45
ENSG00000139842	ENST00000375441	CUL4A	cullin 4A	4	3	233	7	0	1	0.0301	0.0352	1.45
ENSG00000175467	ENST00000312397	SART1	squamous cell carcinoma antigen recognized by T cells	1	0	97	8	3	1	0.0306	0.0355	1.45
ENSG00000107929	ENST00000316157	LARP4B	La ribonucleoprotein domain family, member 4B	10	0	450	14	1	1	0.0307	0.0355	1.45
ENSG00000150938	ENST00000280527	CRIM1	cysteine rich transmembrane BMP regulator 1	11	5	885	6	6	1	0.0311	0.0355	1.45
ENSG00000173846	ENST00000372201	PLK3	polo-like kinase 3	1	0	18	8	0	1	0.0311	0.0355	1.45
ENSG00000127526	ENST00000436494	SLC35E1	solute carrier family 35, member E1	6	0	66	4	0	1	0.0312	0.0355	1.45
ENSG00000100445	ENST00000336353	SDR39U1	short chain dehydrogenase/reductase family 39U, member 1	1	0	3	6	0	1	0.0313	0.0355	1.45
ENSG00000068024	ENST00000345617	HDAC4	histone deacetylase 4	7	0	1804	12	10	1	0.0315	0.0356	1.45
ENSG00000156304	ENST00000286835	SCAF4	SR-related CTD-associated factor 4	5	0	452	20	3	2	0.0319	0.0358	1.45
ENSG00000165458	ENST00000298229	INPPL1	inositol polyphosphate phosphatase-like 1	1	0	64	19	0	1	0.032	0.0358	1.45
ENSG00000109424	ENST00000262999	UCP1	uncoupling protein 1	4	0	47	5	0	1	0.0328	0.0366	1.44
ENSG00000135074	ENST00000257527	ADAM19	ADAM metallopeptidase domain 19	4	0	404	10	0	1	0.033	0.0367	1.44
ENSG00000104626	ENST00000250263	ERI1	exoribonuclease 1	1	0	237	5	2	1	0.0332	0.0367	1.44
ENSG00000178031	ENST00000380548	ADAMTSL1	ADAMTS-like 1	4	3	2137	14	7	1	0.0333	0.0367	1.44
ENSG00000087088	ENST00000293288	BAX	BCL2-associated X protein	4	0	20	5	0	1	0.0336	0.0367	1.44
ENSG00000243772	ENST00000434419	KIR2DL3	killer cell immunoglobulin-like receptor, two domains, long cytoplasmic tail, 3	1	0	156	5	0	1	0.0336	0.0367	1.44
ENSG00000158816	ENST00000375089	VWA5B1	von Willebrand factor A domain containing 5B1	1	0	252	9	1	1	0.0338	0.0368	1.43
ENSG00000169594	ENST00000345382	BNC1	basonuclin 1	1	0	176	9	2	1	0.035	0.0379	1.42
ENSG00000148835	ENST00000369839	TAF5	TAF5 RNA polymerase II, TATA box binding protein	2	0	120	9	0	1	0.0355	0.0383	1.42
ENSG00000006453	ENST00000005260	BAIAP2L1	BAI1-associated protein 2-like 1	1	0	655	8	4	1	0.0358	0.0383	1.42
ENSG00000120899	ENST00000397501	PTK2B	PTK2B protein tyrosine kinase 2 beta	1	0	795	12	4	1	0.036	0.0383	1.42
ENSG00000135766	ENST00000366641	EGLN1	egl nine homolog 1	5	0	269	3	2	1	0.0361	0.0383	1.42
ENSG00000198917	ENST00000361256	C9orf114	chromosome 9 open reading frame 114	2	0	31	8	0	1	0.0366	0.0387	1.41
ENSG00000232769	ENST00000428465	AL138968.1	Uncharacterized protein	13	4	71	13	4	3	0.0382	0.0402	1.4
ENSG00000166394	ENST00000299498	CYB5R2	cytochrome b5 reductase 2	1	0	29	6	0	1	0.0385	0.0403	1.39
ENSG00000117461	ENST00000262741	PIK3R3	phosphoinositide-3-kinase, regulatory subunit 3	2	0	640	4	4	1	0.0389	0.0404	1.39
ENSG00000171862	ENST00000371953	PTEN	phosphatase and tensin homolog	11	0	736	8	2	1	0.039	0.0404	1.39
ENSG00000132139	ENST00000254466	GAS2L2	growth arrest-specific 2 like 2	1	0	29	15	0	1	0.0395	0.0407	1.39
ENSG00000242550	ENST00000238508	SERPINB10	serpin peptidase inhibitor, clade B	2	0	196	8	2	2	0.0396	0.0407	1.39
ENSG00000144395	ENST00000389175	CCDC150	coiled-coil domain containing 150	3	0	665	16	21	3	0.0401	0.041	1.39
ENSG00000182272	ENST00000329962	B4GALNT4	beta-1,4-N-acetyl-galactosaminyl transferase 4	1	0	56	12	1	1	0.0406	0.0414	1.38
ENSG00000152253	ENST00000282074	SPC25	SPC25, NDC80 kinetochore complex component, homolog	1	0	129	4	0	1	0.0409	0.0414	1.38
ENSG00000133104	ENST00000423217	SPG20	spastic paraplegia 20	2	0	302	9	7	1	0.041	0.0414	1.38
ENSG00000116688	ENST00000235329	MFN2	mitofusin 2	4	0	149	5	4	1	0.0418	0.0416	1.38
ENSG00000143614	ENST00000368655	GATAD2B	GATA zinc finger domain containing 2B	11	1	611	5	2	1	0.0418	0.0416	1.38
ENSG00000163468	ENST00000443745	CCT3	chaperonin containing TCP1, subunit 3	2	0	193	5	0	1	0.0418	0.0416	1.38
ENSG00000241322	ENST00000261644	CDRT1	CMT1A duplicated region transcript 1	1	0	192	4	15	1	0.0424	0.042	1.38
ENSG00000166986	ENST00000262027	MARS	methionyl-tRNA synthetase	2	0	145	12	6	2	0.0428	0.0423	1.37
ENSG00000089057	ENST00000379333	SLC23A2	solute carrier family 23	4	1	1098	7	8	1	0.0431	0.0424	1.37
ENSG00000128908	ENST00000361937	INO80	INO80 homolog	1	0	974	10	6	1	0.0439	0.0429	1.37
ENSG00000176542	ENST00000316407	KIAA2018	KIAA2018	18	2	297	18	12	4	0.0439	0.0429	1.37
ENSG00000106341	ENST00000342032	PPP1R17	protein phosphatase 1, regulatory subunit 17	1	0	94	5	0	1	0.0442	0.043	1.37
ENSG00000107020	ENST00000223864	PLGRKT	plasminogen receptor, C-terminal lysine transmembrane protein	1	0	465	4	5	1	0.0446	0.0432	1.36
ENSG00000168952	ENST00000396700	STXBP6	syntaxin binding protein 6	4	0	938	3	2	1	0.0453	0.0437	1.36
ENSG00000103091	ENST00000262144	WDR59	WD repeat domain 59	4	1	783	4	13	1	0.0465	0.0447	1.35
ENSG00000164600	ENST00000297142	NEUROD6	neuronal differentiation 6	1	0	20	6	1	1	0.0468	0.0449	1.35
ENSG00000053108	ENST00000360575	FSTL4	follistatin-like 4	1	0	2197	7	13	1	0.0474	0.0451	1.35
ENSG00000082929	ENST00000195455	C4orf6	chromosome 4 open reading frame 6	1	0	4	4	0	1	0.0476	0.0451	1.35
ENSG00000138755	ENST00000264888	CXCL9	chemokine	2	0	24	4	0	1	0.0476	0.0451	1.35
ENSG00000102271	ENST00000373119	KLHL4	kelch-like 4	7	0	1062	6	4	1	0.0494	0.0465	1.33
ENSG00000168918	ENST00000359570	INPP5D	inositol polyphosphate-5-phosphatase, 145kDa	2	0	636	13	7	1	0.0496	0.0465	1.33
ENSG00000137691	ENST00000260246	C11orf70	chromosome 11 open reading frame 70	3	0	271	5	3	1	0.0499	0.0466	1.33
ENSG00000173214	ENST00000368847	KIAA1919	KIAA1919	7	1	49	15	3	3	0.0505	0.047	1.33
ENSG00000074219	ENST00000311227	TEAD2	TEA domain family member 2	4	0	124	12	0	1	0.0521	0.0482	1.32
ENSG00000182255	ENST00000328224	KCNA4	potassium voltage-gated channel, shaker-related subfamily, member 4	1	0	21	11	0	1	0.0522	0.0482	1.32
ENSG00000078269	ENST00000355585	SYNJ2	synaptojanin 2	9	0	645	25	2	2	0.0526	0.0484	1.32
ENSG00000242866	ENST00000450892	STRC	stereocilin	1	0	44	29	0	1	0.053	0.0486	1.31
ENSG00000109670	ENST00000281708	FBXW7	F-box and WD repeat domain containing 7, E3 ubiquitin protein ligase	6	1	1646	6	3	1	0.0531	0.0486	1.31
ENSG00000155957	ENST00000358230	TMBIM4	transmembrane BAX inhibitor motif containing 4	5	0	233	7	10	2	0.0536	0.0488	1.31
ENSG00000137497	ENST00000359652	NUMA1	nuclear mitotic apparatus protein 1	1	0	333	11	4	1	0.055	0.0498	1.3
ENSG00000130518	ENST00000392413	KIAA1683	KIAA1683	1	0	47	13	0	1	0.055	0.0498	1.3
ENSG00000109943	ENST00000227348	CRTAM	cytotoxic and regulatory T cell molecule	2	0	227	7	0	1	0.0558	0.0503	1.3
ENSG00000196865	ENST00000369301	NHLRC2	NHL repeat containing 2	6	0	423	12	1	1	0.0569	0.0511	1.29
ENSG00000169436	ENST00000303045	COL22A1	collagen, type XXII, alpha 1	4	0	1240	28	8	1	0.0579	0.0517	1.29
ENSG00000124574	ENST00000244533	ABCC10	ATP-binding cassette, sub-family C	5	0	57	18	0	1	0.0579	0.0517	1.29
ENSG00000137225	ENST00000398776	CAPN11	calpain 11	1	0	125	10	0	1	0.0588	0.0523	1.28
ENSG00000166200	ENST00000299259	COPS2	COP9 constitutive photomorphogenic homolog subunit 2	1	0	189	10	2	1	0.0593	0.0526	1.28
ENSG00000111087	ENST00000228682	GLI1	GLI family zinc finger 1	1	0	35	25	0	1	0.0598	0.0528	1.28
ENSG00000070785	ENST00000360403	EIF2B3	eukaryotic translation initiation factor 2B, subunit 3 gamma, 58kDa	1	0	904	4	24	1	0.0602	0.0528	1.28
ENSG00000143183	ENST00000367881	TMCO1	transmembrane and coiled-coil domains 1	1	0	280	4	2	1	0.0602	0.0528	1.28
ENSG00000145495	ENST00000511802	MARCH6	membrane-associated ring finger	1	0	431	5	6	1	0.0607	0.053	1.28
ENSG00000166689	ENST00000448080	PLEKHA7	pleckstrin homology domain containing, family A member 7	1	0	1284	14	13	1	0.0612	0.053	1.28
ENSG00000145088	ENST00000273668	EAF2	ELL associated factor 2	1	0	421	3	6	1	0.0613	0.053	1.28
ENSG00000114923	ENST00000358055	SLC4A3	solute carrier family 4, anion exchanger, member 3	2	0	65	27	2	2	0.0617	0.053	1.28
ENSG00000158270	ENST00000400256	COLEC12	collectin sub-family member 12	7	0	1092	13	13	2	0.062	0.0531	1.27
ENSG00000214655	ENST00000398706	KIAA0913	KIAA0913	2	0	44	30	0	1	0.0624	0.0533	1.27
ENSG00000169660	ENST00000337014	HEXDC	hexosaminidase	1	0	134	11	0	1	0.0628	0.0535	1.27
ENSG00000079432	ENST00000160740	CIC	capicua homolog	1	0	26	36	0	1	0.0633	0.0537	1.27
ENSG00000144848	ENST00000402314	ATG3	autophagy related 3	1	0	220	4	16	1	0.0637	0.0537	1.27
ENSG00000183624	ENST00000502878	C3orf37	chromosome 3 open reading frame 37	1	0	123	4	0	1	0.0637	0.0537	1.27
ENSG00000237441	ENST00000497454	RGL2	ral guanine nucleotide dissociation stimulator-like 2	1	0	13	20	0	1	0.0639	0.0537	1.27
ENSG00000124788	ENST00000450222	ATXN1	ataxin 1	17	0	2917	12	31	1	0.0648	0.0542	1.27
ENSG00000101384	ENST00000254958	JAG1	jagged 1	4	2	148	14	1	1	0.0651	0.0542	1.27
ENSG00000162434	ENST00000342505	JAK1	Janus kinase 1	2	0	818	11	7	2	0.0651	0.0542	1.27
ENSG00000139437	ENST00000312777	TCHP	trichoplein, keratin filament binding	1	0	67	3	2	1	0.0658	0.0546	1.26
ENSG00000087087	ENST00000388793	SRRT	serrate RNA effector molecule homolog	1	0	81	13	0	1	0.0666	0.0548	1.26
ENSG00000116221	ENST00000360840	MRPL37	mitochondrial ribosomal protein L37	1	0	66	6	3	1	0.067	0.0548	1.26
ENSG00000171931	ENST00000308799	FBXW10	F-box and WD repeat domain containing 10	2	0	227	8	2	2	0.0671	0.0548	1.26
ENSG00000078403	ENST00000377072	MLLT10	myeloid/lymphoid or mixed-lineage leukemia	1	0	1570	13	2	1	0.0673	0.0548	1.26
ENSG00000139679	ENST00000378434	LPAR6	lysophosphatidic acid receptor 6	1	0	206	11	2	1	0.0674	0.0548	1.26
ENSG00000065150	ENST00000261574	IPO5	importin 5	1	0	398	11	0	1	0.0674	0.0548	1.26
ENSG00000120549	ENST00000442879	KIAA1217	KIAA1217	4	1	1980	18	4	1	0.0685	0.0552	1.26
ENSG00000135424	ENST00000257880	ITGA7	integrin, alpha 7	1	0	108	16	0	1	0.0686	0.0552	1.26
ENSG00000180772	ENST00000371906	AGTR2	angiotensin II receptor, type 2	2	0	16	5	0	1	0.0686	0.0552	1.26
ENSG00000148154	ENST00000374279	UGCG	UDP-glucose ceramide glucosyltransferase	12	3	300	6	4	1	0.0687	0.0552	1.26
ENSG00000155380	ENST00000369626	SLC16A1	solute carrier family 16, member 1	4	0	278	7	0	1	0.0705	0.0563	1.25
ENSG00000119535	ENST00000373103	CSF3R	colony stimulating factor 3 receptor	1	0	30	13	1	1	0.0707	0.0563	1.25
ENSG00000221955	ENST00000332979	SLC12A8	solute carrier family 12	4	0	782	7	4	1	0.0711	0.0564	1.25
ENSG00000223474	ENST00000441255	AL020996.1	Uncharacterized protein	3	4	111	2	0	1	0.0717	0.0566	1.25
ENSG00000024862	ENST00000026464	CCDC28A	coiled-coil domain containing 28A	1	0	174	6	3	1	0.0718	0.0566	1.25
ENSG00000177728	ENST00000314256	KIAA0195	KIAA0195	1	0	202	14	0	1	0.0723	0.0569	1.24
ENSG00000188868	ENST00000293725	ZNF563	zinc finger protein 563	9	0	92	4	2	2	0.0728	0.0571	1.24
ENSG00000170266	ENST00000307363	GLB1	galactosidase, beta 1	1	0	655	8	6	1	0.0737	0.0574	1.24
ENSG00000181722	ENST00000462705	ZBTB20	zinc finger and BTB domain containing 20	11	1	5450	8	40	1	0.0737	0.0574	1.24
ENSG00000176204	ENST00000409088	LRRTM4	leucine rich repeat transmembrane neuronal 4	6	1	18	4	2	1	0.0739	0.0574	1.24
ENSG00000124160	ENST00000290231	NCOA5	nuclear receptor coactivator 5	3	0	123	8	1	1	0.075	0.0581	1.24
ENSG00000196169	ENST00000440684	KIF19	kinesin family member 19	1	0	204	15	1	1	0.0756	0.0584	1.23
ENSG00000196277	ENST00000486284	GRM7	glutamate receptor, metabotropic 7	7	3	6013	9	79	1	0.0762	0.0587	1.23
ENSG00000136715	ENST00000357702	SAP130	Sin3A-associated protein, 130kDa	1	0	575	10	4	1	0.0768	0.059	1.23
ENSG00000173068	ENST00000380672	BNC2	basonuclin 2	5	1	2375	9	2	1	0.077	0.059	1.23
ENSG00000162620	ENST00000415760	LRRIQ3	leucine-rich repeats and IQ motif containing 3	5	0	1301	10	29	2	0.078	0.0595	1.23
ENSG00000066427	ENST00000359819	ATXN3	ataxin 3	13	2	306	5	7	1	0.0786	0.0598	1.22
ENSG00000136866	ENST00000374227	ZFP37	zinc finger protein 37 homolog	3	0	69	12	2	2	0.0802	0.0609	1.22
ENSG00000164941	ENST00000343161	INTS8	integrator complex subunit 8	1	0	540	10	10	1	0.0812	0.0614	1.21
ENSG00000092847	ENST00000373204	EIF2C1	eukaryotic translation initiation factor 2C, 1	6	0	217	10	0	1	0.0814	0.0614	1.21
ENSG00000106714	ENST00000297668	CNTNAP3	contactin associated protein-like 3	1	1	1327	11	5	1	0.0826	0.0621	1.21
ENSG00000124920	ENST00000278836	C11orf9	chromosome 11 open reading frame 9	1	0	167	20	4	1	0.0839	0.0629	1.2
ENSG00000116062	ENST00000234420	MSH6	mutS homolog 6	2	0	153	18	0	2	0.0843	0.0631	1.2
ENSG00000169967	ENST00000409947	MAP3K2	mitogen-activated protein kinase kinase kinase 2	16	11	703	7	1	1	0.0865	0.0643	1.19
ENSG00000083642	ENST00000315596	PDS5B	PDS5, regulator of cohesion maintenance, homolog B	6	0	1604	26	38	2	0.0875	0.0649	1.19
ENSG00000115084	ENST00000245680	SLC35F5	solute carrier family 35, member F5	3	0	354	14	10	2	0.0884	0.0654	1.18
ENSG00000228422	ENST00000427835	C20orf61	chromosome 20 open reading frame 61	2	6	226	3	6	2	0.0887	0.0654	1.18
ENSG00000025796	ENST00000369002	SEC63	SEC63 homolog	15	6	686	11	29	2	0.0894	0.0656	1.18
ENSG00000133056	ENST00000367187	PIK3C2B	phosphoinositide-3-kinase, class 2, beta polypeptide	7	0	349	19	4	1	0.0895	0.0656	1.18
ENSG00000166851	ENST00000300093	PLK1	polo-like kinase 1	1	0	38	5	0	1	0.0904	0.0657	1.18
ENSG00000140835	ENST00000338482	CHST4	carbohydrate	1	0	78	5	0	1	0.0904	0.0657	1.18
ENSG00000153786	ENST00000313732	ZDHHC7	zinc finger, DHHC-type containing 7	4	0	183	5	1	1	0.0904	0.0657	1.18
ENSG00000150076	ENST00000302316	C10orf68	chromosome 10 open reading frame 68	1	0	2341	13	31	1	0.0909	0.0657	1.18
ENSG00000119912	ENST00000265986	IDE	insulin-degrading enzyme	1	0	869	13	10	1	0.0909	0.0657	1.18
ENSG00000108773	ENST00000225916	KAT2A	K(lysine) acetyltransferase 2A	1	0	39	8	0	1	0.0929	0.067	1.17
ENSG00000198690	ENST00000362065	FAN1	FANCD2/FANCI-associated nuclease 1	1	0	201	17	3	1	0.0939	0.0675	1.17
ENSG00000164023	ENST00000394684	SGMS2	sphingomyelin synthase 2	2	0	527	6	1	1	0.0958	0.0687	1.16
ENSG00000113734	ENST00000352523	BNIP1	BCL2/adenovirus E1B 19kDa interacting protein 1	1	0	128	4	2	1	0.0968	0.069	1.16
ENSG00000127022	ENST00000247461	CANX	calnexin	4	0	191	4	5	1	0.0968	0.069	1.16
ENSG00000185920	ENST00000375284	PTCH1	patched 1	5	0	344	16	3	1	0.0974	0.0692	1.16
ENSG00000178175	ENST00000318442	ZNF366	zinc finger protein 366	6	0	257	11	2	1	0.0981	0.0696	1.16
ENSG00000168214	ENST00000342320	RBPJ	recombination signal binding protein for immunoglobulin kappa J region	6	0	530	7	13	1	0.0992	0.0701	1.15
ENSG00000104973	ENST00000377077	MED25	mediator complex subunit 25	1	0	86	27	0	1	0.1	0.0705	1.15
ENSG00000165449	ENST00000395348	SLC16A9	solute carrier family 16, member 9	6	0	324	14	2	1	0.103	0.0722	1.14
ENSG00000170734	ENST00000372236	POLH	polymerase	4	0	271	7	1	1	0.103	0.0722	1.14
ENSG00000121858	ENST00000241261	TNFSF10	tumor necrosis factor	4	0	83	6	0	1	0.106	0.0741	1.13
ENSG00000143319	ENST00000313146	ISG20L2	interferon stimulated exonuclease gene 20kDa-like 2	7	1	8	10	0	1	0.108	0.0751	1.12
ENSG00000082438	ENST00000375458	COBLL1	COBL-like 1	7	0	1189	17	29	2	0.109	0.0752	1.12
ENSG00000107951	ENST00000358107	MTPAP	mitochondrial poly(A) polymerase	9	0	341	18	4	1	0.109	0.0752	1.12
ENSG00000197321	ENST00000375398	SVIL	supervillin	3	1	1697	25	10	1	0.109	0.0752	1.12
ENSG00000064763	ENST00000182377	FAR2	fatty acyl CoA reductase 2	1	0	784	5	15	1	0.11	0.0757	1.12
ENSG00000130723	ENST00000357304	PRRC2B	proline-rich coiled-coil 2B	4	0	381	28	3	1	0.111	0.076	1.12
ENSG00000170802	ENST00000340553	FOXN2	forkhead box N2	8	0	541	8	6	1	0.111	0.076	1.12
ENSG00000119866	ENST00000335712	BCL11A	B-cell CLL/lymphoma 11A	20	1	520	14	3	1	0.112	0.0763	1.12
ENSG00000105675	ENST00000262623	ATP4A	ATPase, H+/K+ exchanging, alpha polypeptide	1	0	40	10	0	1	0.112	0.0763	1.12
ENSG00000183775	ENST00000507359	KCTD16	potassium channel tetramerisation domain containing 16	2	0	1879	7	49	1	0.113	0.0766	1.12
ENSG00000100532	ENST00000216420	CGRRF1	cell growth regulator with ring finger domain 1	1	0	255	6	1	1	0.113	0.0766	1.12
ENSG00000166341	ENST00000299441	DCHS1	dachsous 1	1	0	88	40	1	1	0.114	0.077	1.11
ENSG00000189079	ENST00000334344	ARID2	AT rich interactive domain 2	8	0	1334	14	4	2	0.115	0.0773	1.11
ENSG00000108375	ENST00000407977	RNF43	ring finger protein 43	1	0	270	14	1	1	0.115	0.0773	1.11
ENSG00000197249	ENST00000448921	SERPINA1	serpin peptidase inhibitor, clade A	2	1	43	7	0	1	0.117	0.0784	1.11
ENSG00000186479	ENST00000334025	RGS7BP	regulator of G-protein signaling 7 binding protein	1	0	512	8	2	1	0.118	0.0789	1.1
ENSG00000110713	ENST00000324932	NUP98	nucleoporin 98kDa	1	0	898	10	0	1	0.119	0.079	1.1
ENSG00000152578	ENST00000393127	GRIA4	glutamate receptor, ionotropic, AMPA 4	4	1	2023	10	6	1	0.119	0.079	1.1
ENSG00000143278	ENST00000367412	F13B	coagulation factor XIII, B polypeptide	1	0	193	6	2	1	0.119	0.079	1.1
ENSG00000111249	ENST00000261726	CUX2	cut-like homeobox 2	1	0	1534	20	10	1	0.121	0.0793	1.1
ENSG00000183304	ENST00000381003	FAM9A	family with sequence similarity 9, member A	1	0	50	7	2	1	0.121	0.0793	1.1
ENSG00000180357	ENST00000326648	ZNF609	zinc finger protein 609	1	0	1322	27	18	1	0.121	0.0793	1.1
ENSG00000115750	ENST00000263663	TAF1B	TATA box binding protein	2	0	680	16	41	2	0.121	0.0793	1.1
ENSG00000197818	ENST00000417961	SLC9A8	solute carrier family 9, subfamily A	4	0	512	10	20	2	0.122	0.0797	1.1
ENSG00000165434	ENST00000298198	PGM2L1	phosphoglucomutase 2-like 1	14	0	427	11	2	1	0.123	0.0798	1.1
ENSG00000104888	ENST00000221485	SLC17A7	solute carrier family 17	1	0	87	13	1	1	0.123	0.0798	1.1
ENSG00000109536	ENST00000226798	FRG1	FSHD region gene 1	1	0	153	7	0	1	0.123	0.0798	1.1
ENSG00000166987	ENST00000355673	MBD6	methyl-CpG binding domain protein 6	1	0	12	45	0	1	0.124	0.0802	1.1
ENSG00000189233	ENST00000413272	NUGGC	nuclear GTPase, germinal center associated	8	0	367	15	2	1	0.125	0.0807	1.09
ENSG00000153317	ENST00000357668	ASAP1	ArfGAP with SH3 domain, ankyrin repeat and PH domain 1	7	0	2123	21	6	1	0.126	0.0809	1.09
ENSG00000141543	ENST00000269349	EIF4A3	eukaryotic translation initiation factor 4A3	1	0	59	5	3	1	0.126	0.0809	1.09
ENSG00000185873	ENST00000332644	TMPRSS11B	transmembrane protease, serine 11B	2	0	79	8	0	1	0.127	0.0809	1.09
ENSG00000158445	ENST00000371741	KCNB1	potassium voltage-gated channel, Shab-related subfamily, member 1	7	0	540	11	3	1	0.127	0.0809	1.09
ENSG00000109265	ENST00000504228	KIAA1211	KIAA1211	1	0	320	15	1	1	0.127	0.0809	1.09
ENSG00000104205	ENST00000262211	SGK3	serum/glucocorticoid regulated kinase family, member 3	4	0	1058	11	9	1	0.129	0.082	1.09
ENSG00000115677	ENST00000391975	HDLBP	high density lipoprotein binding protein	1	0	177	13	0	1	0.13	0.0825	1.08
ENSG00000215039	ENST00000399492	CD27-AS1	CD27 antisense RNA 1	8	0	9	10	0	2	0.133	0.0839	1.08
ENSG00000163072	ENST00000458381	NOSTRIN	nitric oxide synthase trafficker	1	0	419	8	5	1	0.133	0.0839	1.08
ENSG00000109452	ENST00000513000	INPP4B	inositol polyphosphate-4-phosphatase, type II, 105kDa	6	0	5875	10	34	1	0.134	0.0844	1.07
ENSG00000070081	ENST00000323688	NUCB2	nucleobindin 2	1	0	447	9	9	1	0.135	0.0846	1.07
ENSG00000137672	ENST00000344327	TRPC6	transient receptor potential cation channel, subfamily C, member 6	1	0	836	9	10	1	0.135	0.0846	1.07
ENSG00000117597	ENST00000367020	DIEXF	digestive organ expansion factor homolog	7	0	147	10	2	1	0.136	0.085	1.07
ENSG00000083290	ENST00000395544	ULK2	unc-51-like kinase 2	5	0	747	8	7	1	0.138	0.0861	1.06
ENSG00000138587	ENST00000260453	MNS1	meiosis-specific nuclear structural 1	1	0	295	12	16	1	0.139	0.0861	1.06
ENSG00000153037	ENST00000505459	SRP19	signal recognition particle 19kDa	4	0	39	5	0	1	0.139	0.0861	1.06
ENSG00000138593	ENST00000261847	SECISBP2L	SECIS binding protein 2-like	4	0	427	19	10	1	0.139	0.0861	1.06
ENSG00000009724	ENST00000400897	MASP2	mannan-binding lectin serine peptidase 2	1	0	83	11	0	1	0.14	0.0865	1.06
ENSG00000138346	ENST00000399180	DNA2	DNA replication helicase 2 homolog	1	0	464	19	18	1	0.141	0.0867	1.06
ENSG00000077380	ENST00000397119	DYNC1I2	dynein, cytoplasmic 1, intermediate chain 2	1	0	530	10	18	1	0.141	0.0867	1.06
ENSG00000092203	ENST00000405508	TOX4	TOX high mobility group box family member 4	2	0	110	13	2	1	0.142	0.0871	1.06
ENSG00000206562	ENST00000443029	METTL6	methyltransferase like 6	9	0	255	5	0	1	0.144	0.0881	1.06
ENSG00000114480	ENST00000429644	GBE1	glucan	2	0	2017	6	11	1	0.147	0.0897	1.05
ENSG00000164796	ENST00000297405	CSMD3	CUB and Sushi multiple domains 3	4	0	9601	26	86	2	0.149	0.0907	1.04
ENSG00000083223	ENST00000277141	ZCCHC6	zinc finger, CCHC domain containing 6	4	2	472	16	9	2	0.15	0.0911	1.04
ENSG00000122012	ENST00000502798	SV2C	synaptic vesicle glycoprotein 2C	16	4	1372	7	2	1	0.151	0.0913	1.04
ENSG00000133789	ENST00000318950	SWAP70	SWAP switching B-cell complex 70kDa subunit	3	0	602	9	11	1	0.151	0.0913	1.04
ENSG00000177485	ENST00000326624	ZBTB33	zinc finger and BTB domain containing 33	3	0	16	9	0	1	0.152	0.0917	1.04
ENSG00000168679	ENST00000369779	SLC16A4	solute carrier family 16, member 4	3	0	185	7	9	1	0.153	0.0921	1.04
ENSG00000147488	ENST00000276480	ST18	suppression of tumorigenicity 18	6	3	2026	14	33	1	0.155	0.0929	1.03
ENSG00000008300	ENST00000164024	CELSR3	cadherin, EGF LAG seven-pass G-type receptor 3	1	0	66	33	0	1	0.155	0.0929	1.03
ENSG00000131149	ENST00000253458	KIAA0182	KIAA0182	6	1	295	23	2	1	0.157	0.0936	1.03
ENSG00000041515	ENST00000356711	MYO16	myosin XVI	7	0	4087	24	72	1	0.157	0.0936	1.03
ENSG00000140937	ENST00000394156	CDH11	cadherin 11, type 2, OB-cadherin	8	3	805	10	1	1	0.158	0.094	1.03
ENSG00000169855	ENST00000343019	ROBO1	roundabout, axon guidance receptor, homolog 1	7	1	2956	10	33	1	0.159	0.0942	1.03
ENSG00000184898	ENST00000331426	RBM43	RNA binding motif protein 43	11	0	87	9	4	1	0.161	0.0949	1.02
ENSG00000039068	ENST00000261769	CDH1	cadherin 1, type 1, E-cadherin	9	0	498	11	0	1	0.161	0.0949	1.02
ENSG00000181378	ENST00000341552	CCDC108	coiled-coil domain containing 108	4	0	157	27	1	1	0.163	0.0959	1.02
ENSG00000101115	ENST00000217086	SALL4	sal-like 4	1	0	83	10	0	1	0.164	0.0962	1.02
ENSG00000229676	ENST00000456783	ZNF492	zinc finger protein 492	5	1	284	4	1	1	0.166	0.097	1.01
ENSG00000083817	ENST00000196489	ZNF416	zinc finger protein 416	1	0	18	4	0	1	0.166	0.097	1.01
ENSG00000170381	ENST00000307792	SEMA3E	sema domain, immunoglobulin domain	5	0	2131	10	19	1	0.167	0.0973	1.01
ENSG00000186638	ENST00000402558	KIF24	kinesin family member 24	1	0	427	15	3	1	0.168	0.0973	1.01
ENSG00000162105	ENST00000338508	SHANK2	SH3 and multiple ankyrin repeat domains 2	10	0	2619	33	16	1	0.168	0.0973	1.01
ENSG00000134283	ENST00000395568	PPHLN1	periphilin 1	7	2	908	9	2	1	0.168	0.0973	1.01
ENSG00000112305	ENST00000370455	SMAP1	small ArfGAP 1	4	0	1562	9	63	1	0.173	0.0997	1
ENSG00000103449	ENST00000440970	SALL1	sal-like 1	5	2	59	14	0	1	0.173	0.0997	1
ENSG00000138162	ENST00000369005	TACC2	transforming, acidic coiled-coil containing protein 2	1	0	1365	40	20	1	0.178	0.102	0.99
ENSG00000221923	ENST00000422689	ZNF880	zinc finger protein 880	3	1	107	7	0	2	0.178	0.102	0.99
ENSG00000165813	ENST00000369287	C10orf118	chromosome 10 open reading frame 118	3	0	360	20	1	1	0.181	0.103	0.99
ENSG00000121904	ENST00000373381	CSMD2	CUB and Sushi multiple domains 2	10	2	2615	34	8	1	0.181	0.103	0.99
ENSG00000213186	ENST00000309784	TRIM59	tripartite motif containing 59	3	0	106	11	6	2	0.182	0.104	0.98
ENSG00000148396	ENST00000313050	SEC16A	SEC16 homolog A	5	0	156	28	0	1	0.183	0.104	0.98
ENSG00000152583	ENST00000418378	SPARCL1	SPARC-like 1	1	0	319	9	1	1	0.183	0.104	0.98
ENSG00000188153	ENST00000328300	COL4A5	collagen, type IV, alpha 5	2	0	1361	24	0	1	0.184	0.104	0.98
ENSG00000125388	ENST00000398052	GRK4	G protein-coupled receptor kinase 4	3	0	492	10	13	1	0.187	0.106	0.97
ENSG00000137460	ENST00000511601	FHDC1	FH2 domain containing 1	4	0	238	24	0	1	0.188	0.106	0.97
ENSG00000115947	ENST00000392858	ORC4	origin recognition complex, subunit 4	1	0	696	10	11	1	0.189	0.106	0.97
ENSG00000128694	ENST00000264151	OSGEPL1	O-sialoglycoprotein endopeptidase-like 1	2	0	94	10	1	1	0.189	0.106	0.97
ENSG00000163536	ENST00000295777	SERPINI1	serpin peptidase inhibitor, clade I	1	0	565	6	0	1	0.191	0.107	0.97
ENSG00000156140	ENST00000286657	ADAMTS3	ADAM metallopeptidase with thrombospondin type 1 motif, 3	4	0	2097	11	15	1	0.191	0.107	0.97
ENSG00000156802	ENST00000287394	ATAD2	ATPase family, AAA domain containing 2	1	0	633	15	14	1	0.192	0.107	0.97
ENSG00000163029	ENST00000448223	SMC6	structural maintenance of chromosomes 6	2	0	719	19	23	2	0.193	0.107	0.97
ENSG00000125827	ENST00000246024	TMX4	thioredoxin-related transmembrane protein 4	10	0	232	7	2	1	0.194	0.107	0.97
ENSG00000214929	ENST00000344803	FAM75D1	family with sequence similarity 75, member D1	1	0	4	15	0	1	0.194	0.107	0.97
ENSG00000173757	ENST00000293328	STAT5B	signal transducer and activator of transcription 5B	4	1	532	10	3	1	0.195	0.107	0.97
ENSG00000180801	ENST00000315366	ARSJ	arylsulfatase family, member J	1	0	549	12	5	1	0.195	0.107	0.97
ENSG00000001629	ENST00000265742	ANKIB1	ankyrin repeat and IBR domain containing 1	9	0	1252	11	14	1	0.196	0.107	0.97
ENSG00000138095	ENST00000260665	LRPPRC	leucine-rich pentatricopeptide repeat containing	5	0	859	20	11	2	0.196	0.107	0.97
ENSG00000150527	ENST00000280083	CTAGE5	CTAGE family, member 5	4	0	714	18	13	2	0.196	0.107	0.97
ENSG00000116783	ENST00000370895	FPGT-TNNI3K	FPGT-TNNI3K readthrough	6	2	1224	10	4	1	0.197	0.108	0.97
ENSG00000060749	ENST00000399302	QSER1	glutamine and serine rich 1	6	0	638	24	3	2	0.198	0.108	0.97
ENSG00000167981	ENST00000301744	ZNF597	zinc finger protein 597	1	0	33	7	0	1	0.198	0.108	0.97
ENSG00000160469	ENST00000309383	BRSK1	BR serine/threonine kinase 1	1	0	186	12	3	1	0.199	0.108	0.97
ENSG00000166960	ENST00000383096	C18orf34	chromosome 18 open reading frame 34	3	0	3894	22	93	3	0.201	0.109	0.96
ENSG00000189057	ENST00000343597	FAM111B	family with sequence similarity 111, member B	1	0	101	12	0	1	0.201	0.109	0.96
ENSG00000108292	ENST00000325718	MLLT6	myeloid/lymphoid or mixed-lineage leukemia	5	0	77	24	2	1	0.203	0.11	0.96
ENSG00000144426	ENST00000449802	NBEAL1	neurobeachin-like 1	4	0	1704	31	25	3	0.206	0.111	0.95
ENSG00000140632	ENST00000321919	GLYR1	glyoxylate reductase 1 homolog	4	0	272	10	3	1	0.21	0.113	0.95
ENSG00000174705	ENST00000311601	SH3PXD2B	SH3 and PX domains 2B	5	1	591	18	3	1	0.217	0.116	0.94
ENSG00000001631	ENST00000394507	KRIT1	KRIT1, ankyrin repeat containing	1	0	379	11	4	1	0.221	0.118	0.93
ENSG00000127947	ENST00000248594	PTPN12	protein tyrosine phosphatase, non-receptor type 12	1	0	844	12	6	1	0.225	0.12	0.92
ENSG00000013374	ENST00000413040	NUB1	negative regulator of ubiquitin-like proteins 1	1	0	233	12	2	1	0.225	0.12	0.92
ENSG00000196950	ENST00000409086	SLC39A10	solute carrier family 39	6	5	697	13	13	1	0.226	0.12	0.92
ENSG00000064042	ENST00000313875	LIMCH1	LIM and calponin homology domains 1	9	1	549	15	8	1	0.226	0.12	0.92
ENSG00000114770	ENST00000334444	ABCC5	ATP-binding cassette, sub-family C	4	1	584	20	16	2	0.234	0.123	0.91
ENSG00000125257	ENST00000376887	ABCC4	ATP-binding cassette, sub-family C	4	2	1661	24	50	1	0.235	0.124	0.91
ENSG00000119906	ENST00000238961	FAM178A	family with sequence similarity 178, member A	11	0	345	27	7	1	0.24	0.126	0.9
ENSG00000173575	ENST00000394196	CHD2	chromodomain helicase DNA binding protein 2	6	0	965	31	28	1	0.241	0.126	0.9
ENSG00000137975	ENST00000370565	CLCA2	chloride channel accessory 2	1	0	199	13	1	1	0.242	0.126	0.9
ENSG00000160746	ENST00000292246	ANO10	anoctamin 10	1	0	1930	8	32	1	0.242	0.126	0.9
ENSG00000237240	ENST00000456299	U47924.25	Uncharacterized protein	2	3	1731	7	27	2	0.246	0.128	0.89
ENSG00000049618	ENST00000367148	ARID1B	AT rich interactive domain 1B	7	0	2243	27	10	1	0.246	0.128	0.89
ENSG00000214367	ENST00000243706	HAUS3	HAUS augmin-like complex, subunit 3	7	0	72	11	2	1	0.246	0.128	0.89
ENSG00000105694	ENST00000222301	AC104537.1	Fos39347_1; Uncharacterized protein	1	3	1	5	0	1	0.249	0.129	0.89
ENSG00000138592	ENST00000433963	USP8	ubiquitin specific peptidase 8	7	2	595	27	1	1	0.252	0.13	0.89
ENSG00000163125	ENST00000401000	RPRD2	regulation of nuclear pre-mRNA domain containing 2	8	0	766	22	3	1	0.252	0.13	0.89
ENSG00000132972	ENST00000381927	RNF17	ring finger protein 17	1	0	893	26	11	1	0.253	0.13	0.89
ENSG00000075420	ENST00000336824	FNDC3B	fibronectin type III domain containing 3B	15	6	2272	12	14	1	0.255	0.131	0.88
ENSG00000198862	ENST00000389194	LTN1	listerin E3 ubiquitin protein ligase 1	8	0	523	31	43	3	0.256	0.131	0.88
ENSG00000183150	ENST00000332427	GPR19	G protein-coupled receptor 19	1	0	219	8	2	1	0.257	0.131	0.88
ENSG00000139155	ENST00000381552	SLCO1C1	solute carrier organic anion transporter family, member 1C1	1	0	385	8	3	1	0.257	0.131	0.88
ENSG00000118473	ENST00000371038	SGIP1	SH3-domain GRB2-like	3	0	1436	17	16	1	0.26	0.132	0.88
ENSG00000138674	ENST00000432794	SEC31A	SEC31 homolog A	6	0	602	15	20	1	0.262	0.133	0.88
ENSG00000166266	ENST00000299351	CUL5	cullin 5	10	2	767	14	9	1	0.262	0.133	0.88
ENSG00000097046	ENST00000428239	CDC7	cell division cycle 7 homolog	1	0	190	11	4	1	0.264	0.133	0.88
ENSG00000134775	ENST00000257209	FHOD3	formin homology 2 domain containing 3	1	0	2270	21	15	1	0.264	0.133	0.88
ENSG00000179912	ENST00000403821	R3HDM2	R3H domain containing 2	4	0	618	23	9	1	0.265	0.134	0.87
ENSG00000092020	ENST00000261475	PPP2R3C	protein phosphatase 2, regulatory subunit B'', gamma	1	0	282	9	6	1	0.268	0.134	0.87
ENSG00000150526	ENST00000280082	MIA2	melanoma inhibitory activity 2	3	0	135	9	0	1	0.268	0.134	0.87
ENSG00000131023	ENST00000253339	LATS1	LATS, large tumor suppressor, homolog 1	1	0	321	16	4	1	0.269	0.134	0.87
ENSG00000065183	ENST00000349139	WDR3	WD repeat domain 3	5	1	185	12	1	1	0.269	0.134	0.87
ENSG00000164588	ENST00000303230	HCN1	hyperpolarization activated cyclic nucleotide-gated potassium channel 1	1	0	3248	13	29	1	0.269	0.134	0.87
ENSG00000078687	ENST00000335749	TNRC6C	trinucleotide repeat containing 6C	15	0	672	28	10	1	0.27	0.135	0.87
ENSG00000197299	ENST00000355112	BLM	Bloom syndrome, RecQ helicase-like	1	0	748	26	25	1	0.271	0.135	0.87
ENSG00000104218	ENST00000389042	CSPP1	centrosome and spindle pole associated protein 1	1	0	1048	19	16	1	0.274	0.136	0.87
ENSG00000156983	ENST00000383829	BRPF1	bromodomain and PHD finger containing, 1	4	0	45	18	0	1	0.275	0.136	0.87
ENSG00000165240	ENST00000355691	ATP7A	ATPase, Cu++ transporting, alpha polypeptide	4	0	618	14	4	1	0.277	0.137	0.86
ENSG00000047315	ENST00000381227	POLR2B	polymerase	1	0	320	12	0	1	0.278	0.137	0.86
ENSG00000155966	ENST00000370460	AFF2	AF4/FMR2 family, member 2	5	0	2838	15	17	1	0.279	0.138	0.86
ENSG00000153015	ENST00000508024	CWC27	CWC27 spliceosome-associated protein homolog	1	0	279	8	3	1	0.28	0.138	0.86
ENSG00000038532	ENST00000409790	CLEC16A	C-type lectin domain family 16, member A	1	0	1294	14	13	1	0.281	0.138	0.86
ENSG00000129566	ENST00000262715	TEP1	telomerase-associated protein 1	6	0	197	22	0	1	0.286	0.14	0.85
ENSG00000065615	ENST00000369681	CYB5R4	cytochrome b5 reductase 4	1	0	803	12	8	1	0.286	0.14	0.85
ENSG00000145623	ENST00000274276	OSMR	oncostatin M receptor	1	0	637	9	6	1	0.286	0.14	0.85
ENSG00000152404	ENST00000409771	CWF19L2	CWF19-like 2, cell cycle control	1	0	1020	15	4	1	0.288	0.14	0.85
ENSG00000091157	ENST00000254442	WDR7	WD repeat domain 7	4	3	2880	14	17	1	0.298	0.145	0.84
ENSG00000075945	ENST00000367765	KIFAP3	kinesin-associated protein 3	1	0	1256	12	7	1	0.3	0.146	0.84
ENSG00000148773	ENST00000368654	MKI67	antigen identified by monoclonal antibody Ki-67	1	0	112	36	0	1	0.301	0.146	0.84
ENSG00000188039	ENST00000420818	NWD1	NACHT and WD repeat domain containing 1	3	0	556	17	3	1	0.303	0.147	0.83
ENSG00000004700	ENST00000444129	RECQL	RecQ protein-like	5	1	191	8	12	1	0.304	0.147	0.83
ENSG00000174371	ENST00000366548	EXO1	exonuclease 1	1	0	309	13	4	1	0.305	0.147	0.83
ENSG00000101544	ENST00000262198	ADNP2	ADNP homeobox 2	11	0	203	16	1	1	0.307	0.148	0.83
ENSG00000135945	ENST00000258428	REV1	REV1, polymerase	1	0	656	16	8	1	0.313	0.15	0.82
ENSG00000157827	ENST00000288670	FMNL2	formin-like 2	1	0	1992	16	15	1	0.313	0.15	0.82
ENSG00000070019	ENST00000261170	GUCY2C	guanylate cyclase 2C	2	0	550	17	6	2	0.316	0.151	0.82
ENSG00000164116	ENST00000296518	GUCY1A3	guanylate cyclase 1, soluble, alpha 3	5	1	392	15	7	1	0.317	0.151	0.82
ENSG00000231360	ENST00000455342	AL592284.2	Uncharacterized protein	1	1	978	12	6	1	0.32	0.153	0.82
ENSG00000226104	ENST00000430975	AC011475.1	Uncharacterized protein	2	0	3	2	3	2	0.323	0.153	0.82
ENSG00000141447	ENST00000319481	OSBPL1A	oxysterol binding protein-like 1A	4	0	1807	12	26	1	0.323	0.153	0.82
ENSG00000104133	ENST00000261866	SPG11	spastic paraplegia 11	1	0	797	33	15	1	0.326	0.154	0.81
ENSG00000079134	ENST00000261600	THOC1	THO complex 1	2	0	395	13	1	1	0.328	0.155	0.81
ENSG00000163006	ENST00000295124	CCDC138	coiled-coil domain containing 138	1	0	701	15	7	1	0.334	0.157	0.8
ENSG00000115267	ENST00000263642	IFIH1	interferon induced with helicase C domain 1	2	0	344	15	6	1	0.334	0.157	0.8
ENSG00000106443	ENST00000403050	PHF14	PHD finger protein 14	1	0	1030	15	11	1	0.338	0.159	0.8
ENSG00000180530	ENST00000400202	NRIP1	nuclear receptor interacting protein 1	3	2	739	21	12	1	0.339	0.159	0.8
ENSG00000134516	ENST00000256935	DOCK2	dedicator of cytokinesis 2	1	0	1927	16	13	1	0.34	0.159	0.8
ENSG00000198633	ENST00000332323	ZNF534	zinc finger protein 534	6	0	47	6	0	1	0.341	0.159	0.8
ENSG00000159788	ENST00000336727	RGS12	regulator of G-protein signaling 12	1	0	676	28	9	1	0.342	0.159	0.8
ENSG00000064270	ENST00000416219	ATP2C2	ATPase, Ca++ transporting, type 2C, member 2	1	0	590	16	6	1	0.344	0.16	0.8
ENSG00000178935	ENST00000391701	ZNF552	zinc finger protein 552	1	0	24	7	0	1	0.345	0.16	0.8
ENSG00000182463	ENST00000371497	TSHZ2	teashirt zinc finger homeobox 2	12	1	2932	12	20	1	0.348	0.161	0.79
ENSG00000168038	ENST00000301831	ULK4	unc-51-like kinase 4	1	0	5644	13	205	1	0.349	0.161	0.79
ENSG00000197415	ENST00000362010	VEPH1	ventricular zone expressed PH domain homolog 1	2	0	1771	13	46	1	0.349	0.161	0.79
ENSG00000177853	ENST00000371192	ZNF518A	zinc finger protein 518A	2	0	3	32	0	1	0.35	0.161	0.79
ENSG00000174282	ENST00000311403	ZBTB4	zinc finger and BTB domain containing 4	10	3	68	32	1	1	0.352	0.162	0.79
ENSG00000126804	ENST00000358738	ZBTB1	zinc finger and BTB domain containing 1	4	0	194	12	4	1	0.354	0.163	0.79
ENSG00000121058	ENST00000240316	COIL	coilin	5	0	186	12	7	1	0.355	0.163	0.79
ENSG00000088538	ENST00000266037	DOCK3	dedicator of cytokinesis 3	2	0	4789	16	19	1	0.359	0.164	0.79
ENSG00000214842	ENST00000430642	RAD51AP2	RAD51 associated protein 2	5	3	140	28	2	2	0.365	0.167	0.78
ENSG00000060237	ENST00000315939	WNK1	WNK lysine deficient protein kinase 1	4	0	1287	20	44	1	0.37	0.169	0.77
ENSG00000079841	ENST00000264839	RIMS1	regulating synaptic membrane exocytosis 1	5	2	2672	17	4	1	0.373	0.17	0.77
ENSG00000145632	ENST00000274289	PLK2	polo-like kinase 2	2	0	8	11	0	1	0.374	0.17	0.77
ENSG00000187889	ENST00000343433	C1orf168	chromosome 1 open reading frame 168	1	0	593	16	18	1	0.381	0.173	0.76
ENSG00000163535	ENST00000357799	SGOL2	shugoshin-like 2	3	0	441	29	8	2	0.386	0.174	0.76
ENSG00000113361	ENST00000265071	CDH6	cadherin 6, type 2, K-cadherin	10	5	889	12	8	1	0.386	0.174	0.76
ENSG00000217128	ENST00000307968	FNIP1	folliculin interacting protein 1	10	0	1200	12	15	1	0.386	0.174	0.76
ENSG00000149474	ENST00000278816	CSRP2BP	CSRP2 binding protein	4	3	333	13	2	1	0.395	0.178	0.75
ENSG00000132554	ENST00000360863	RGS22	regulator of G-protein signaling 22	1	0	1132	26	35	1	0.4	0.18	0.74
ENSG00000178974	ENST00000313833	FBXO34	F-box protein 34	4	1	633	15	11	1	0.402	0.181	0.74
ENSG00000147133	ENST00000449580	TAF1	TAF1 RNA polymerase II, TATA box binding protein	3	0	661	20	7	1	0.404	0.181	0.74
ENSG00000145390	ENST00000450251	USP53	ubiquitin specific peptidase 53	10	1	349	17	5	1	0.406	0.182	0.74
ENSG00000028203	ENST00000436874	VEZT	vezatin, adherens junctions transmembrane protein	1	0	716	12	27	1	0.411	0.183	0.74
ENSG00000078618	ENST00000354831	NRD1	nardilysin	1	0	651	16	10	1	0.411	0.183	0.74
ENSG00000144445	ENST00000281772	KANSL1L	KAT8 regulatory NSL complex subunit 1-like	5	0	1164	19	8	1	0.418	0.186	0.73
ENSG00000188171	ENST00000392298	ZNF626	zinc finger protein 626	8	2	267	6	1	1	0.421	0.187	0.73
ENSG00000205592	ENST00000425730	MUC19	mucin 19, oligomeric	2	0	577	18	9	2	0.421	0.187	0.73
ENSG00000135336	ENST00000392844	ORC3	origin recognition complex, subunit 3	1	0	592	14	5	1	0.426	0.188	0.73
ENSG00000078018	ENST00000360351	MAP2	microtubule-associated protein 2	5	2	1117	26	4	1	0.426	0.188	0.73
ENSG00000170004	ENST00000380358	CHD3	chromodomain helicase DNA binding protein 3	1	0	122	30	1	1	0.428	0.189	0.72
ENSG00000055609	ENST00000355193	MLL3	myeloid/lymphoid or mixed-lineage leukemia 3	7	0	2513	52	68	3	0.428	0.189	0.72
ENSG00000066777	ENST00000262215	ARFGEF1	ADP-ribosylation factor guanine nucleotide-exchange factor 1	1	0	1080	27	3	1	0.435	0.19	0.72
ENSG00000136628	ENST00000435048	EPRS	glutamyl-prolyl-tRNA synthetase	1	0	555	16	4	1	0.44	0.192	0.72
ENSG00000101773	ENST00000360790	RBBP8	retinoblastoma binding protein 8	1	0	752	17	18	1	0.442	0.193	0.71
ENSG00000166164	ENST00000394688	BRD7	bromodomain containing 7	2	0	255	12	1	1	0.449	0.195	0.71
ENSG00000039537	ENST00000263413	C6	complement component 6	1	0	796	15	2	1	0.452	0.196	0.71
ENSG00000153827	ENST00000283943	TRIP12	thyroid hormone receptor interactor 12	1	0	1246	21	6	1	0.452	0.196	0.71
ENSG00000157426	ENST00000205214	AASDH	aminoadipate-semialdehyde dehydrogenase	1	0	338	18	12	1	0.461	0.199	0.7
ENSG00000113318	ENST00000265081	MSH3	mutS homolog 3	2	0	1609	12	26	1	0.463	0.2	0.7
ENSG00000149311	ENST00000299392	ATM	ataxia telangiectasia mutated	16	0	1033	23	6	1	0.467	0.201	0.7
ENSG00000138709	ENST00000326639	LARP1B	La ribonucleoprotein domain family, member 1B	2	1	1248	20	15	1	0.468	0.201	0.7
ENSG00000148840	ENST00000278070	PPRC1	peroxisome proliferator-activated receptor gamma, coactivator-related 1	2	0	65	22	4	2	0.468	0.201	0.7
ENSG00000104517	ENST00000220959	UBR5	ubiquitin protein ligase E3 component n-recognin 5	3	0	1287	34	17	1	0.468	0.201	0.7
ENSG00000138182	ENST00000416354	KIF20B	kinesin family member 20B	1	0	663	42	9	1	0.474	0.203	0.69
ENSG00000171988	ENST00000399262	JMJD1C	jumonji domain containing 1C	4	1	2446	40	36	1	0.477	0.204	0.69
ENSG00000131504	ENST00000398557	DIAPH1	diaphanous homolog 1	1	0	663	22	2	1	0.481	0.205	0.69
ENSG00000101407	ENST00000373448	TTI1	TELO2 interacting protein 1	1	0	289	16	0	1	0.488	0.208	0.68
ENSG00000146463	ENST00000314607	ZMYM4	zinc finger, MYM-type 4	2	0	1298	22	30	1	0.493	0.21	0.68
ENSG00000164304	ENST00000502583	CAGE1	cancer antigen 1	1	0	407	16	2	1	0.494	0.21	0.68
ENSG00000114487	ENST00000232603	MORC1	MORC family CW-type zinc finger 1	4	0	1217	21	35	2	0.499	0.212	0.67
ENSG00000176225	ENST00000255674	RTTN	rotatin	2	0	1586	27	25	2	0.513	0.217	0.66
ENSG00000154309	ENST00000284476	DISP1	dispatched homolog 1	1	0	530	21	6	1	0.516	0.218	0.66
ENSG00000126773	ENST00000406854	C14orf135	chromosome 14 open reading frame 135	1	0	299	17	0	1	0.519	0.219	0.66
ENSG00000198000	ENST00000360868	NOL8	nucleolar protein 8	1	0	140	21	4	1	0.522	0.22	0.66
ENSG00000134115	ENST00000446702	CNTN6	contactin 6	2	0	2296	16	46	1	0.524	0.22	0.66
ENSG00000162621	ENST00000416014	LRRC53	leucine rich repeat containing 53	1	0	61	19	0	1	0.534	0.224	0.65
ENSG00000108506	ENST00000444766	INTS2	integrator complex subunit 2	9	0	512	13	8	1	0.542	0.227	0.64
ENSG00000040731	ENST00000264463	CDH10	cadherin 10, type 2	5	0	1345	16	20	1	0.554	0.231	0.64
ENSG00000144824	ENST00000431670	PHLDB2	pleckstrin homology-like domain, family B, member 2	6	0	728	18	3	1	0.566	0.235	0.63
ENSG00000171827	ENST00000330173	ZNF570	zinc finger protein 570	1	0	98	8	2	1	0.571	0.237	0.63
ENSG00000184575	ENST00000332707	XPOT	exportin, tRNA	1	0	359	14	11	1	0.577	0.239	0.62
ENSG00000135315	ENST00000403245	KIAA1009	KIAA1009	2	0	732	29	3	2	0.579	0.239	0.62
ENSG00000092853	ENST00000251195	CLSPN	claspin	5	0	268	21	0	1	0.59	0.244	0.61
ENSG00000237765	ENST00000422728	FAM200B	family with sequence similarity 200, member B	1	0	20	23	0	1	0.591	0.244	0.61
ENSG00000127481	ENST00000375267	UBR4	ubiquitin protein ligase E3 component n-recognin 4	4	0	643	35	3	1	0.592	0.244	0.61
ENSG00000129810	ENST00000412997	SGOL1	shugoshin-like 1	3	0	111	15	3	1	0.593	0.244	0.61
ENSG00000151835	ENST00000281578	SACS	spastic ataxia of Charlevoix-Saguenay	5	0	661	84	16	2	0.607	0.249	0.6
ENSG00000188888	ENST00000398597	GPR179	G protein-coupled receptor 179	1	0	49	35	0	1	0.613	0.251	0.6
ENSG00000072571	ENST00000393915	HMMR	hyaluronan-mediated motility receptor	1	0	253	16	5	1	0.617	0.252	0.6
ENSG00000023287	ENST00000025008	RB1CC1	RB1-inducible coiled-coil 1	7	0	694	38	6	1	0.621	0.253	0.6
ENSG00000224867	ENST00000416839	AC096644.1	Uncharacterized protein	1	1	32	6	11	1	0.624	0.254	0.6
ENSG00000091009	ENST00000265271	RBM27	RNA binding motif protein 27	7	0	769	18	16	1	0.625	0.254	0.6
ENSG00000236320	ENST00000415846	SLFN14	schlafen family member 14	1	0	53	17	0	1	0.631	0.256	0.59
ENSG00000113649	ENST00000296702	TCERG1	transcription elongation regulator 1	3	0	522	22	7	1	0.638	0.258	0.59
ENSG00000154262	ENST00000284425	ABCA6	ATP-binding cassette, sub-family A	2	0	433	23	8	2	0.645	0.26	0.59
ENSG00000183035	ENST00000329312	CYLC1	cylicin, basic protein of sperm head cytoskeleton 1	1	0	160	26	2	1	0.649	0.262	0.58
ENSG00000125482	ENST00000334270	TTF1	transcription termination factor, RNA polymerase I	1	0	191	28	3	1	0.659	0.265	0.58
ENSG00000103550	ENST00000420899	C16orf88	chromosome 16 open reading frame 88	1	0	44	17	0	1	0.661	0.265	0.58
ENSG00000155903	ENST00000286364	RASA2	RAS p21 protein activator 2	2	0	924	18	5	1	0.662	0.265	0.58
ENSG00000198765	ENST00000369522	SYCP1	synaptonemal complex protein 1	1	0	1158	23	37	1	0.662	0.265	0.58
ENSG00000146414	ENST00000367503	SHPRH	SNF2 histone linker PHD RING helicase, E3 ubiquitin protein ligase	2	0	636	24	12	1	0.67	0.268	0.57
ENSG00000129317	ENST00000416848	PUS7L	pseudouridylate synthase 7 homolog	4	0	198	17	0	1	0.682	0.272	0.57
ENSG00000005339	ENST00000262367	CREBBP	CREB binding protein	2	0	1013	40	3	1	0.686	0.274	0.56
ENSG00000133958	ENST00000393153	UNC79	unc-79 homolog	1	0	1714	33	24	1	0.692	0.276	0.56
ENSG00000204186	ENST00000374423	ZDBF2	zinc finger, DBF-type containing 2	4	0	317	34	4	1	0.697	0.277	0.56
ENSG00000102908	ENST00000349945	NFAT5	nuclear factor of activated T-cells 5, tonicity-responsive	12	3	911	20	3	1	0.702	0.279	0.55
ENSG00000145740	ENST00000396591	SLC30A5	solute carrier family 30	6	0	237	19	0	1	0.708	0.28	0.55
ENSG00000171467	ENST00000361428	ZNF318	zinc finger protein 318	1	0	192	32	1	1	0.71	0.281	0.55
ENSG00000186714	ENST00000335185	CCDC73	coiled-coil domain containing 73	1	0	1586	36	25	1	0.712	0.281	0.55
ENSG00000092148	ENST00000261312	HECTD1	HECT domain containing E3 ubiquitin protein ligase 1	1	0	860	27	6	1	0.718	0.283	0.55
ENSG00000119684	ENST00000355774	MLH3	mutL homolog 3	2	0	199	24	4	1	0.731	0.287	0.54
ENSG00000038427	ENST00000265077	VCAN	versican	4	3	743	27	8	1	0.735	0.289	0.54
ENSG00000163629	ENST00000436978	PTPN13	protein tyrosine phosphatase, non-receptor type 13	1	0	1733	33	25	1	0.737	0.289	0.54
ENSG00000185792	ENST00000332836	NLRP9	NLR family, pyrin domain containing 9	1	0	153	11	2	1	0.739	0.289	0.54
ENSG00000145725	ENST00000451606	PPIP5K2	diphosphoinositol pentakisphosphate kinase 2	3	0	706	24	11	1	0.74	0.289	0.54
ENSG00000155085	ENST00000424296	AKD1	adenylate kinase domain containing 1	3	3	375	27	2	1	0.741	0.289	0.54
ENSG00000156920	ENST00000394143	GPR112	G protein-coupled receptor 112	1	0	736	36	2	1	0.746	0.291	0.54
ENSG00000173064	ENST00000377560	C12orf51	chromosome 12 open reading frame 51	2	0	894	37	5	1	0.751	0.292	0.53
ENSG00000080345	ENST00000243326	RIF1	RAP1 interacting factor homolog	4	0	530	55	9	2	0.756	0.293	0.53
ENSG00000185010	ENST00000360256	F8	coagulation factor VIII, procoagulant component	1	0	1220	36	16	1	0.76	0.294	0.53
ENSG00000151150	ENST00000280772	ANK3	ankyrin 3, node of Ranvier	9	2	2674	83	31	1	0.769	0.297	0.53
ENSG00000181555	ENST00000330022	SETD2	SET domain containing 2	1	0	797	23	3	1	0.771	0.298	0.53
ENSG00000107290	ENST00000372169	SETX	senataxin	5	0	643	37	2	1	0.779	0.3	0.52
ENSG00000125107	ENST00000317147	CNOT1	CCR4-NOT transcription complex, subunit 1	4	1	808	20	7	1	0.784	0.302	0.52
ENSG00000141027	ENST00000268712	NCOR1	nuclear receptor corepressor 1	1	0	1396	27	23	1	0.793	0.305	0.52
ENSG00000122482	ENST00000370440	ZNF644	zinc finger protein 644	3	0	841	31	30	1	0.797	0.306	0.51
ENSG00000167548	ENST00000301067	MLL2	myeloid/lymphoid or mixed-lineage leukemia 2	7	0	84	111	5	3	0.807	0.309	0.51
ENSG00000168356	ENST00000450244	SCN11A	sodium channel, voltage-gated, type XI, alpha subunit	6	2	663	26	4	1	0.813	0.311	0.51
ENSG00000134744	ENST00000371544	ZCCHC11	zinc finger, CCHC domain containing 11	7	0	983	37	14	1	0.82	0.313	0.5
ENSG00000114127	ENST00000264951	XRN1	5'-3' exoribonuclease 1	6	0	1125	30	20	1	0.835	0.319	0.5
ENSG00000152818	ENST00000367545	UTRN	utrophin	4	0	4070	38	24	1	0.841	0.321	0.49
ENSG00000184445	ENST00000333479	KNTC1	kinetochore associated 1	1	0	793	24	14	1	0.844	0.321	0.49
ENSG00000042781	ENST00000366943	USH2A	Usher syndrome 2A	1	0	5353	47	23	1	0.847	0.321	0.49
ENSG00000163946	ENST00000432540	FAM208A	family with sequence similarity 208, member A	11	2	386	28	2	1	0.848	0.321	0.49
ENSG00000118412	ENST00000455594	CASP8AP2	caspase 8 associated protein 2	1	0	334	35	10	1	0.848	0.321	0.49
ENSG00000160007	ENST00000404338	ARHGAP35	Rho GTPase activating protein 35	1	0	478	23	2	1	0.859	0.325	0.49
ENSG00000154263	ENST00000269081	ABCA10	ATP-binding cassette, sub-family A	1	0	624	23	6	1	0.86	0.325	0.49
ENSG00000173769	ENST00000309765	C3orf77	chromosome 3 open reading frame 77	4	0	771	29	18	1	0.863	0.325	0.49
ENSG00000164190	ENST00000282516	NIPBL	Nipped-B homolog	6	0	1631	40	19	2	0.864	0.325	0.49
ENSG00000100503	ENST00000245441	NIN	ninein	3	2	536	31	2	1	0.867	0.326	0.49
ENSG00000129534	ENST00000310806	MIS18BP1	MIS18 binding protein 1	1	0	331	32	20	1	0.873	0.328	0.48
ENSG00000139697	ENST00000420886	SBNO1	strawberry notch homolog 1	1	0	409	28	9	1	0.877	0.329	0.48
ENSG00000155754	ENST00000439140	ALS2CR11	amyotrophic lateral sclerosis 2	1	0	1031	48	12	1	0.881	0.33	0.48
ENSG00000118997	ENST00000312428	DNAH7	dynein, axonemal, heavy chain 7	4	0	2575	49	60	1	0.882	0.33	0.48
ENSG00000139618	ENST00000380152	BRCA2	breast cancer 2, early onset	3	0	550	97	13	1	0.885	0.33	0.48
ENSG00000153201	ENST00000283195	RANBP2	RAN binding protein 2	1	0	451	48	4	1	0.888	0.331	0.48
ENSG00000163714	ENST00000319822	U2SURP	U2 snRNP-associated SURP domain containing	8	0	400	32	2	1	0.889	0.331	0.48
ENSG00000175054	ENST00000350721	ATR	ataxia telangiectasia and Rad3 related	2	0	1029	41	26	2	0.892	0.332	0.48
ENSG00000133640	ENST00000393217	LRRIQ1	leucine-rich repeats and IQ motif containing 1	2	0	1644	38	47	2	0.896	0.333	0.48
ENSG00000117523	ENST00000392078	PRRC2C	proline-rich coiled-coil 2C	4	0	787	47	30	1	0.897	0.333	0.48
ENSG00000188994	ENST00000369577	ZNF292	zinc finger protein 292	8	0	829	53	19	2	0.899	0.333	0.48
ENSG00000174501	ENST00000456556	ANKRD36C	ankyrin repeat domain 36C	1	0	795	49	4	1	0.9	0.333	0.48
ENSG00000163939	ENST00000356770	PBRM1	polybromo 1	4	0	961	35	4	1	0.911	0.336	0.47
ENSG00000105877	ENST00000328843	DNAH11	dynein, axonemal, heavy chain 11	1	0	2418	57	25	1	0.914	0.336	0.47
ENSG00000218819	ENST00000405799	AC010872.2	Uncharacterized protein	1	0	104	53	2	1	0.921	0.339	0.47
ENSG00000196074	ENST00000357552	SYCP2	synaptonemal complex protein 2	5	0	558	45	11	2	0.936	0.343	0.46
ENSG00000038219	ENST00000040738	BOD1L1	biorientation of chromosomes in cell division 1-like 1	10	0	336	58	3	1	0.938	0.343	0.46
ENSG00000112159	ENST00000369393	MDN1	MDN1, midasin homolog	4	0	1266	53	13	1	0.939	0.343	0.46
ENSG00000165671	ENST00000439151	NSD1	nuclear receptor binding SET domain protein 1	6	0	1235	39	8	1	0.94	0.343	0.46
ENSG00000138688	ENST00000264501	KIAA1109	KIAA1109	1	0	1654	57	22	1	0.941	0.343	0.46
ENSG00000198626	ENST00000366574	RYR2	ryanodine receptor 2	8	2	5771	57	156	1	0.951	0.346	0.46
ENSG00000125844	ENST00000377813	RRBP1	ribosome binding protein 1 homolog 180kDa	1	0	334	62	2	1	0.954	0.346	0.46
ENSG00000137776	ENST00000380516	SLTM	SAFB-like, transcription modulator	1	0	403	19	12	1	0.954	0.346	0.46
ENSG00000188906	ENST00000298910	LRRK2	leucine-rich repeat kinase 2	4	0	1042	37	19	1	0.955	0.346	0.46
ENSG00000163092	ENST00000409195	XIRP2	xin actin-binding repeat containing 2	1	0	2784	70	19	1	0.962	0.348	0.46
ENSG00000198707	ENST00000309041	CEP290	centrosomal protein 290kDa	3	0	749	62	25	3	0.969	0.35	0.46
ENSG00000145734	ENST00000358731	BDP1	B double prime 1, subunit of RNA polymerase III transcription initiation factor IIIB	7	2	848	44	12	1	0.976	0.352	0.45
ENSG00000123104	ENST00000451599	ITPR2	inositol 1,4,5-trisphosphate receptor, type 2	5	0	3297	49	33	1	0.981	0.352	0.45
ENSG00000197603	ENST00000508244	C5orf42	chromosome 5 open reading frame 42	5	0	1076	61	12	2	0.981	0.352	0.45
ENSG00000120800	ENST00000261637	UTP20	UTP20, small subunit	2	0	759	45	6	1	0.982	0.352	0.45
ENSG00000154265	ENST00000392676	ABCA5	ATP-binding cassette, sub-family A	2	0	598	41	11	1	0.983	0.352	0.45
ENSG00000177200	ENST00000219084	CHD9	chromodomain helicase DNA binding protein 9	4	0	2087	48	11	1	0.994	0.356	0.45
ENSG00000176208	ENST00000321990	ATAD5	ATPase family, AAA domain containing 5	3	0	508	64	1	1	0.999	0.356	0.45
ENSG00000151914	ENST00000370769	DST	dystonin	3	0	2684	100	28	1	0.999	0.356	0.45
ENSG00000188738	ENST00000424728	FSIP2	fibrous sheath interacting protein 2	2	0	602	154	11	2	0.999	0.356	0.45
